# Supplementary material for: Synthesis of mononuclear and dinuclear ruthenium(ii) tris(heteroleptic) complexes via photosubstitution in bis(carbonyl) precursors
Source: Royal Society of Chemistry journal article supplement (doi:10.1039/b510751b), 2005-10-26
Supplement: b510751b.pdf [file b510751b.pdf]

Figure S1.  $^1\text{H}$  NMR ( $\text{CD}_3\text{CN}$ ) and DPV of the photolysis mixture obtained after irradiating  $[\text{Ru}(\text{bpy})(\text{CO})_2\text{Cl}_2]$  in MeCN for 1 h. Main fraction  $[\text{Ru}(\text{bpy})(\text{MeCN})_3\text{Cl}]\text{Cl}$ . Arrows point to the four (two partly hidden) aromatic resonances of  $[\text{Ru}(\text{bpy})(\text{MeCN})_2\text{Cl}_2]$ .

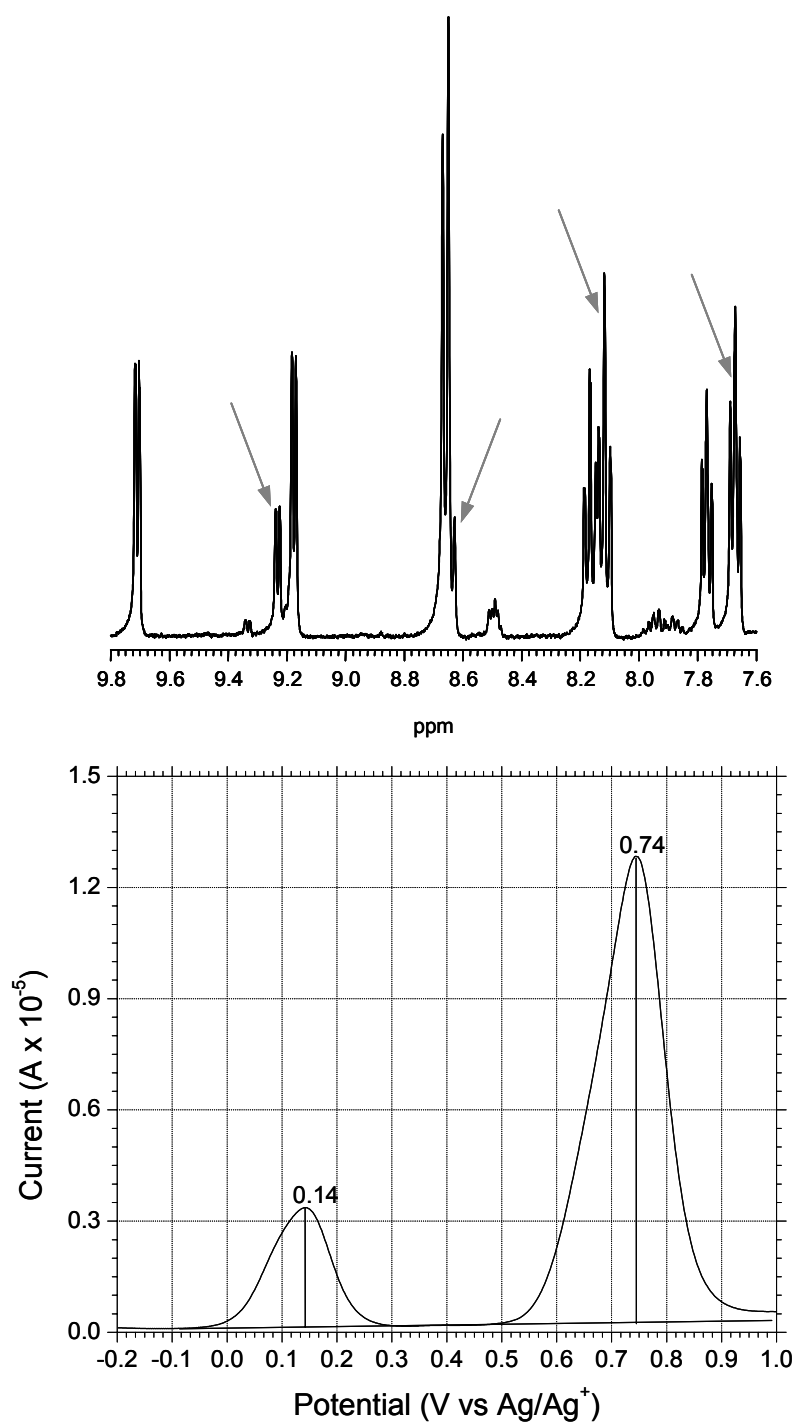

Figure S2.  $^1\text{H}$  NMR of  $[\text{Ru}(\text{bpy})(\text{Me}_2\text{bpy})\text{Cl}_2]$  in  $\text{d}_6$ -DMSO with peak assignment peaks.

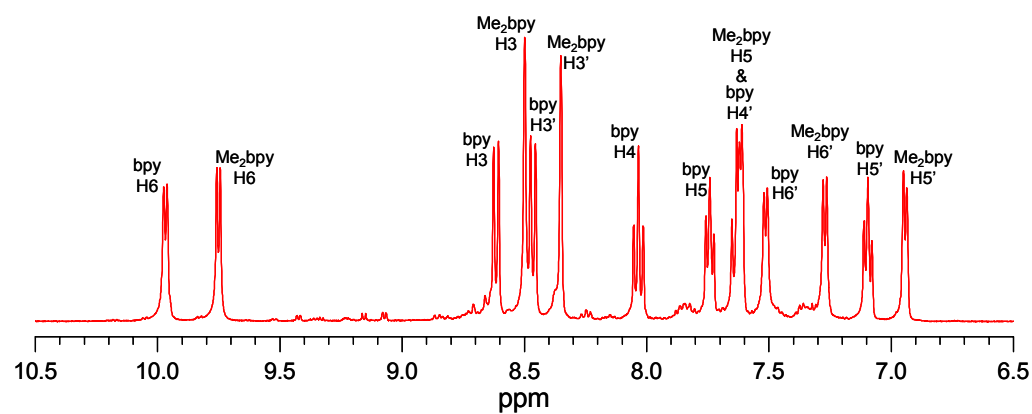

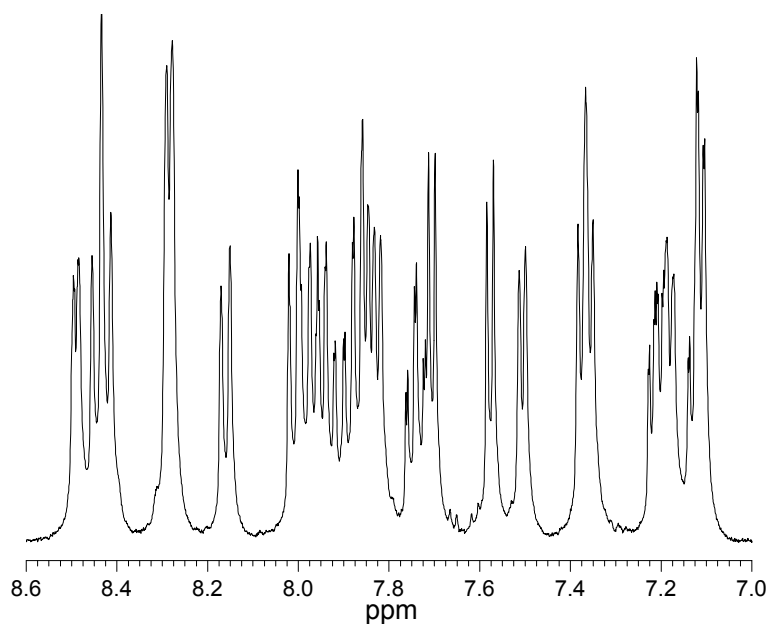

Figure S3.  $^1\text{H}$  NMR of the aromatic region of the crystal sample of  $[\text{Ru}(\text{bpy})(\text{Me}_2\text{bpy})(\text{bpt})]^+$  in  $d_3\text{-MeCN}$ .
